# Supplementary material
Source: HighWire-hosted journal article supplement (https://jitc.bmj.com/content/8/2/e001866)
Supplement: inline-supplementary-material-4 [file inline-supplementary-material-4.xlsx]

## Sheet: gsea_report_for_H_PD-L1
NAME	ES	NES	FDR q-val	FWER p-val
BIOCARTA_HIVNEF_PATHWAY	0.636518	2.49787	0	0
BIOCARTA_DEATH_PATHWAY	0.684113	2.26991	0	0
BIOCARTA_MAPK_PATHWAY	0.475581	2.25247	0	0
BIOCARTA_STRESS_PATHWAY	0.647349	2.23652	0	0
BIOCARTA_KERATINOCYTE_PATHWAY	0.668075	2.15684	0.000632512	0.002
BIOCARTA_NTHI_PATHWAY	0.709178	2.15484	0.000527094	0.002
BIOCARTA_FAS_PATHWAY	0.640565	2.14349	0.000979923	0.005
BIOCARTA_TOLL_PATHWAY	0.68824	2.11071	0.00183937	0.009
BIOCARTA_EGF_PATHWAY	0.600307	2.09327	0.00221254	0.011
BIOCARTA_CHEMICAL_PATHWAY	0.546283	2.08159	0.00246305	0.014
BIOCARTA_TNFR1_PATHWAY	0.536164	2.0738	0.00253472	0.016
BIOCARTA_TNFR2_PATHWAY	0.745078	2.05784	0.0034226	0.022
BIOCARTA_MET_PATHWAY	0.573564	2.04913	0.00343486	0.025
BIOCARTA_NFKB_PATHWAY	0.675639	2.0221	0.00448113	0.037
BIOCARTA_PDGF_PATHWAY	0.620398	2.0072	0.00584898	0.044
BIOCARTA_CCR5_PATHWAY	0.854554	1.99121	0.0063726	0.052
BIOCARTA_TCR_PATHWAY	0.732826	1.98861	0.00629376	0.054
BIOCARTA_IL2RB_PATHWAY	0.747341	1.98782	0.00594411	0.054
BIOCARTA_SODD_PATHWAY	0.84202	1.97353	0.00650798	0.063
BIOCARTA_CASPASE_PATHWAY	0.731549	1.96137	0.00709101	0.07
BIOCARTA_P38MAPK_PATHWAY	0.477415	1.96073	0.0068601	0.072
BIOCARTA_BCR_PATHWAY	0.690789	1.95918	0.00654828	0.072
BIOCARTA_RELA_PATHWAY	0.655465	1.9542	0.00680192	0.077
BIOCARTA_MITOCHONDRIA_PATHWAY	0.558675	1.953	0.0067292	0.079
BIOCARTA_IL2_PATHWAY	0.781291	1.94435	0.00696847	0.084
BIOCARTA_IL1R_PATHWAY	0.669095	1.9407	0.00713984	0.089
BIOCARTA_SET_PATHWAY	0.883814	1.93853	0.00712405	0.091
BIOCARTA_PML_PATHWAY	0.72301	1.93702	0.00694689	0.092
BIOCARTA_AKT_PATHWAY	0.599411	1.937	0.00670734	0.092
BIOCARTA_CD40_PATHWAY	0.716433	1.93541	0.00658806	0.093
BIOCARTA_PTEN_PATHWAY	0.564782	1.92594	0.00743857	0.102
BIOCARTA_TID_PATHWAY	0.708025	1.91115	0.0091037	0.129
BIOCARTA_41BB_PATHWAY	0.748706	1.90834	0.00892682	0.13
BIOCARTA_GSK3_PATHWAY	0.562153	1.89986	0.00959997	0.141
BIOCARTA_TALL1_PATHWAY	0.770807	1.89543	0.00953532	0.144
BIOCARTA_TPO_PATHWAY	0.609581	1.8843	0.010611	0.16
BIOCARTA_BCELLSURVIVAL_PATHWAY	0.63893	1.88021	0.0109532	0.168
BIOCARTA_FCER1_PATHWAY	0.621118	1.86771	0.0121483	0.191
BIOCARTA_CXCR4_PATHWAY	0.555318	1.86104	0.0126495	0.205
BIOCARTA_D4GDI_PATHWAY	0.809906	1.8507	0.0132332	0.217
BIOCARTA_GH_PATHWAY	0.620174	1.85044	0.0129105	0.217
BIOCARTA_CSK_PATHWAY	0.837975	1.84444	0.0132007	0.226
BIOCARTA_IL6_PATHWAY	0.56617	1.84233	0.0132038	0.227
BIOCARTA_HSP27_PATHWAY	0.693165	1.8414	0.0129557	0.228
BIOCARTA_HDAC_PATHWAY	0.555817	1.82544	0.0150202	0.258
BIOCARTA_GLEEVEC_PATHWAY	0.529916	1.82287	0.015177	0.263
BIOCARTA_TOB1_PATHWAY	0.825355	1.79636	0.0188872	0.312
BIOCARTA_IL7_PATHWAY	0.837234	1.79535	0.0185436	0.313
BIOCARTA_ARENRF2_PATHWAY	0.646012	1.79444	0.0182431	0.314
BIOCARTA_CYTOKINE_PATHWAY	0.82263	1.78685	0.018963	0.324
BIOCARTA_IL12_PATHWAY	0.911364	1.78598	0.0186907	0.325
BIOCARTA_FMLP_PATHWAY	0.546608	1.78122	0.0189754	0.332
BIOCARTA_RAC1_PATHWAY	0.643104	1.77912	0.0189233	0.338
BIOCARTA_INFLAM_PATHWAY	0.797244	1.77278	0.0198735	0.351
BIOCARTA_RNA_PATHWAY	0.593916	1.77106	0.019878	0.354
BIOCARTA_ACH_PATHWAY	0.662568	1.76881	0.0201941	0.36
BIOCARTA_IL22BP_PATHWAY	0.739496	1.76793	0.0199313	0.361
BIOCARTA_RANKL_PATHWAY	0.701266	1.76268	0.0205891	0.372
BIOCARTA_IL10_PATHWAY	0.743949	1.76057	0.0207899	0.378
BIOCARTA_CTCF_PATHWAY	0.606737	1.75773	0.0212342	0.388
BIOCARTA_NKCELLS_PATHWAY	0.844798	1.75107	0.0223097	0.405
BIOCARTA_CDC42RAC_PATHWAY	0.575127	1.74786	0.0226395	0.407
BIOCARTA_NKT_PATHWAY	0.874416	1.74436	0.0231239	0.418
BIOCARTA_HCMV_PATHWAY	0.57522	1.74411	0.0228198	0.418
BIOCARTA_PAR1_PATHWAY	0.563146	1.74379	0.0225368	0.419
BIOCARTA_CDMAC_PATHWAY	0.605156	1.7401	0.0227945	0.425
BIOCARTA_LAIR_PATHWAY	0.842332	1.74008	0.0224543	0.425
BIOCARTA_BAD_PATHWAY	0.581823	1.73673	0.0228353	0.43
BIOCARTA_ERK5_PATHWAY	0.5347	1.73655	0.0225407	0.43
BIOCARTA_GCR_PATHWAY	0.593985	1.73448	0.0226205	0.435
BIOCARTA_STATHMIN_PATHWAY	0.740874	1.73295	0.0226885	0.438
BIOCARTA_BIOPEPTIDES_PATHWAY	0.479428	1.72857	0.0233341	0.448
BIOCARTA_PTDINS_PATHWAY	0.453447	1.71542	0.0259958	0.481
BIOCARTA_IL3_PATHWAY	0.686417	1.71471	0.0257198	0.481
BIOCARTA_CLASSIC_PATHWAY	0.871561	1.69888	0.028726	0.511
BIOCARTA_GRANULOCYTES_PATHWAY	0.869179	1.69729	0.0288174	0.514
BIOCARTA_DC_PATHWAY	0.861641	1.69569	0.0288271	0.517
BIOCARTA_COMP_PATHWAY	0.824599	1.69279	0.0294494	0.524
BIOCARTA_IGF1_PATHWAY	0.522646	1.69221	0.0291682	0.525
BIOCARTA_TH1TH2_PATHWAY	0.881605	1.68618	0.03072	0.536
BIOCARTA_HER2_PATHWAY	0.582084	1.68098	0.03187	0.549
BIOCARTA_MONOCYTE_PATHWAY	0.88895	1.67455	0.0329839	0.563
BIOCARTA_PYK2_PATHWAY	0.394885	1.67218	0.0331394	0.57
BIOCARTA_ECM_PATHWAY	0.499502	1.67159	0.0329839	0.574
BIOCARTA_NO2IL12_PATHWAY	0.922694	1.66552	0.0343059	0.588
BIOCARTA_VEGF_PATHWAY	0.495859	1.66218	0.0350243	0.599
BIOCARTA_RAS_PATHWAY	0.444069	1.66137	0.0349377	0.603
BIOCARTA_RHO_PATHWAY	0.420037	1.65733	0.0360781	0.612
BIOCARTA_ASBCELL_PATHWAY	0.93278	1.65324	0.0367879	0.617
BIOCARTA_IL17_PATHWAY	0.842323	1.64948	0.0372354	0.625
BIOCARTA_LYM_PATHWAY	0.832288	1.64825	0.0371973	0.626
BIOCARTA_EDG1_PATHWAY	0.572169	1.64045	0.0389426	0.641
BIOCARTA_AT1R_PATHWAY	0.435458	1.63967	0.0386535	0.641
BIOCARTA_CBL_PATHWAY	0.66994	1.63737	0.0387685	0.644
BIOCARTA_CTLA4_PATHWAY	0.903284	1.6325	0.0398694	0.656
BIOCARTA_IL4_PATHWAY	0.667939	1.63039	0.0399784	0.661
BIOCARTA_MEF2D_PATHWAY	0.510624	1.62944	0.0399395	0.664
BIOCARTA_NUCLEARRS_PATHWAY	0.724277	1.61296	0.0448188	0.694
BIOCARTA_TGFB_PATHWAY	0.519284	1.60947	0.0455518	0.7
BIOCARTA_STEM_PATHWAY	0.727063	1.59712	0.0497594	0.726
BIOCARTA_LONGEVITY_PATHWAY	0.586498	1.58354	0.0548457	0.754
BIOCARTA_BLYMPHOCYTE_PATHWAY	0.918726	1.58158	0.0552275	0.756
BIOCARTA_PPARA_PATHWAY	0.44429	1.56897	0.059909	0.785
BIOCARTA_CREB_PATHWAY	0.47644	1.56447	0.0614192	0.791
BIOCARTA_EPO_PATHWAY	0.447105	1.56079	0.0626829	0.801
BIOCARTA_IL5_PATHWAY	0.816509	1.54681	0.0679974	0.819
BIOCARTA_TFF_PATHWAY	0.467747	1.54514	0.0681409	0.821
BIOCARTA_CCR3_PATHWAY	0.521882	1.53696	0.0716561	0.834
BIOCARTA_ATM_PATHWAY	0.489635	1.53158	0.0735302	0.841
BIOCARTA_ETS_PATHWAY	0.469793	1.53133	0.0730801	0.841
BIOCARTA_TCRA_PATHWAY	0.958102	1.52239	0.0765194	0.853
BIOCARTA_THELPER_PATHWAY	0.934512	1.51084	0.081826	0.874
BIOCARTA_CTL_PATHWAY	0.897012	1.50539	0.0844629	0.879
BIOCARTA_TCAPOPTOSIS_PATHWAY	0.953852	1.49716	0.0889802	0.892
BIOCARTA_SRCRPTP_PATHWAY	0.611149	1.49532	0.0890583	0.893
BIOCARTA_VIP_PATHWAY	0.481204	1.49502	0.0884472	0.893
BIOCARTA_TCYTOTOXIC_PATHWAY	0.944727	1.49411	0.0882205	0.894
BIOCARTA_SPPA_PATHWAY	0.588043	1.49347	0.0878748	0.895
BIOCARTA_DNAFRAGMENT_PATHWAY	0.571424	1.48928	0.089659	0.896
BIOCARTA_GATA3_PATHWAY	0.569525	1.48224	0.0929524	0.902
BIOCARTA_ARF_PATHWAY	0.461325	1.47712	0.0954306	0.911
BIOCARTA_NGF_PATHWAY	0.4847	1.46211	0.103743	0.922
BIOCARTA_MCALPAIN_PATHWAY	0.475606	1.45972	0.104494	0.925
BIOCARTA_NFAT_PATHWAY	0.428538	1.45386	0.107565	0.929
BIOCARTA_LECTIN_PATHWAY	0.722881	1.44967	0.109117	0.934
BIOCARTA_INSULIN_PATHWAY	0.437625	1.43473	0.11856	0.94
BIOCARTA_RARRXR_PATHWAY	0.479932	1.43181	0.119206	0.942
BIOCARTA_ERYTH_PATHWAY	0.646752	1.4216	0.125497	0.952
BIOCARTA_MYOSIN_PATHWAY	0.454357	1.41797	0.126791	0.953
BIOCARTA_EPONFKB_PATHWAY	0.529675	1.40393	0.136484	0.962
BIOCARTA_FREE_PATHWAY	0.584666	1.38339	0.150895	0.971
BIOCARTA_AGPCR_PATHWAY	0.553954	1.38234	0.150614	0.972
BIOCARTA_EPHA4_PATHWAY	0.626959	1.37861	0.152194	0.973
BIOCARTA_AKAP13_PATHWAY	0.549561	1.35808	0.167636	0.975
BIOCARTA_CALCINEURIN_PATHWAY	0.458568	1.3521	0.171288	0.976
BIOCARTA_ARAP_PATHWAY	0.383302	1.32779	0.191165	0.983
BIOCARTA_EIF4_PATHWAY	0.356634	1.32397	0.193337	0.983
BIOCARTA_VDR_PATHWAY	0.471966	1.29976	0.214155	0.988
BIOCARTA_GPCR_PATHWAY	0.364456	1.29361	0.218842	0.989
BIOCARTA_VITCB_PATHWAY	0.583971	1.29112	0.219583	0.989
BIOCARTA_NOS1_PATHWAY	0.461675	1.28111	0.228122	0.99
BIOCARTA_PLATELETAPP_PATHWAY	0.59122	1.27283	0.234399	0.991
BIOCARTA_P53HYPOXIA_PATHWAY	0.37428	1.26775	0.237811	0.992
BIOCARTA_TRKA_PATHWAY	0.472936	1.2664	0.237424	0.992
BIOCARTA_AKAP95_PATHWAY	0.472445	1.22583	0.276496	0.998
BIOCARTA_CFTR_PATHWAY	0.47507	1.22187	0.278975	0.998
BIOCARTA_RACCYCD_PATHWAY	0.307052	1.21871	0.28019	0.998
BIOCARTA_AKAPCENTROSOME_PATHWAY	0.432003	1.18471	0.314152	0.999
BIOCARTA_ATRBRCA_PATHWAY	0.402466	1.15153	0.348166	0.999
BIOCARTA_IGF1MTOR_PATHWAY	0.313681	1.14516	0.353418	0.999
BIOCARTA_ACE2_PATHWAY	0.550893	1.13632	0.360996	0.999
BIOCARTA_LEPTIN_PATHWAY	0.463885	1.13236	0.363107	0.999
BIOCARTA_EIF2_PATHWAY	0.402126	1.11489	0.381183	0.999
BIOCARTA_AMI_PATHWAY	0.520437	1.10546	0.38993	0.999
BIOCARTA_PGC1A_PATHWAY	0.34282	1.09519	0.399663	0.999
BIOCARTA_IGF1R_PATHWAY	0.316542	1.09451	0.397914	0.999
BIOCARTA_CACAM_PATHWAY	0.417523	1.09023	0.400143	0.999
BIOCARTA_PITX2_PATHWAY	0.334649	1.05755	0.435836	0.999
BIOCARTA_INTRINSIC_PATHWAY	0.489394	1.04551	0.447225	1
BIOCARTA_CERAMIDE_PATHWAY	0.249168	1.03809	0.453887	1
BIOCARTA_PLCE_PATHWAY	0.414228	1.03564	0.454165	1
BIOCARTA_CARDIACEGF_PATHWAY	0.40818	1.03407	0.453675	1
BIOCARTA_BARRESTIN_SRC_PATHWAY	0.377684	1.02988	0.45584	1
BIOCARTA_EXTRINSIC_PATHWAY	0.525818	1.02258	0.462098	1
BIOCARTA_FIBRINOLYSIS_PATHWAY	0.517207	1.01846	0.46441	1
BIOCARTA_INTEGRIN_PATHWAY	0.24749	1.01085	0.471223	1
BIOCARTA_CELLCYCLE_PATHWAY	0.331588	1.00674	0.473548	1
BIOCARTA_NDKDYNAMIN_PATHWAY	0.290236	0.987432	0.495914	1
BIOCARTA_SPRY_PATHWAY	0.342306	0.973915	0.509496	1
BIOCARTA_MTOR_PATHWAY	0.249634	0.972737	0.507948	1
BIOCARTA_CARM_ER_PATHWAY	0.241808	0.966918	0.512196	1
BIOCARTA_NEUROTRANSMITTERS_PATHWAY	0.506305	0.958389	0.519877	1
BIOCARTA_CARM1_PATHWAY	0.338586	0.942966	0.536553	1
BIOCARTA_PS1_PATHWAY	0.316596	0.932678	0.546497	1
BIOCARTA_CHREBP2_PATHWAY	0.229248	0.926218	0.551684	1
BIOCARTA_PARKIN_PATHWAY	0.356081	0.919854	0.556978	1
BIOCARTA_SALMONELLA_PATHWAY	0.315559	0.891775	0.591263	1
BIOCARTA_MTA3_PATHWAY	0.309683	0.868188	0.619112	1
BIOCARTA_WNT_PATHWAY	0.212745	0.868011	0.615833	1
BIOCARTA_G1_PATHWAY	0.261106	0.857119	0.627492	1
BIOCARTA_ALK_PATHWAY	0.2887	0.852251	0.630623	1
BIOCARTA_ERK_PATHWAY	0.228044	0.834395	0.650559	1
BIOCARTA_UCALPAIN_PATHWAY	0.271931	0.795474	0.698869	1
BIOCARTA_ACTINY_PATHWAY	0.229488	0.753979	0.752169	1
BIOCARTA_AGR_PATHWAY	0.236379	0.7316	0.776898	1
BIOCARTA_PROTEASOME_PATHWAY	0.245962	0.722704	0.784012	1
BIOCARTA_NO1_PATHWAY	0.250138	0.698979	0.810587	1
BIOCARTA_EGFR_SMRTE_PATHWAY	0.280863	0.680339	0.828809	1
BIOCARTA_PTC1_PATHWAY	0.267996	0.641345	0.868102	1
BIOCARTA_SARS_PATHWAY	0.246254	0.577511	0.92165	1

## Sheet: gsea_report_for_L_PD-L1
NAME	ES	NES	FDR q-val	FWER p-val
BIOCARTA_GABA_PATHWAY	-0.672774	-1.45316	1	0.924
BIOCARTA_CDK5_PATHWAY	-0.552831	-1.37885	1	0.971
BIOCARTA_P35ALZHEIMERS_PATHWAY	-0.465763	-1.23738	1	0.998
BIOCARTA_SKP2E2F_PATHWAY	-0.46558	-1.20988	1	0.998
BIOCARTA_GLYCOLYSIS_PATHWAY	-0.50899	-1.16689	1	0.998
BIOCARTA_KREB_PATHWAY	-0.401131	-1.03147	1	1
BIOCARTA_BARRESTIN_PATHWAY	-0.408264	-0.948275	1	1
BIOCARTA_BARR_MAPK_PATHWAY	-0.369344	-0.936848	1	1
BIOCARTA_P53_PATHWAY	-0.28928	-0.901639	1	1
BIOCARTA_SHH_PATHWAY	-0.347666	-0.877074	1	1
BIOCARTA_CELL2CELL_PATHWAY	-0.299256	-0.842852	1	1
BIOCARTA_P27_PATHWAY	-0.281396	-0.806121	1	1
BIOCARTA_DREAM_PATHWAY	-0.294929	-0.799628	1	1
BIOCARTA_MCM_PATHWAY	-0.3307	-0.793532	1	1
BIOCARTA_MPR_PATHWAY	-0.226236	-0.779626	1	1
BIOCARTA_RB_PATHWAY	-0.281917	-0.74853	1	1
BIOCARTA_CK1_PATHWAY	-0.277904	-0.744818	1	1
BIOCARTA_HIF_PATHWAY	-0.256096	-0.738493	1	1
BIOCARTA_EIF_PATHWAY	-0.240762	-0.722583	1	1
BIOCARTA_AHSP_PATHWAY	-0.325198	-0.70213	1	1
BIOCARTA_TEL_PATHWAY	-0.219578	-0.700243	1	1
BIOCARTA_FEEDER_PATHWAY	-0.294625	-0.667595	1	1
BIOCARTA_RAB_PATHWAY	-0.239141	-0.645452	1	1
BIOCARTA_MAL_PATHWAY	-0.183915	-0.624357	0.991091	1
BIOCARTA_ETC_PATHWAY	-0.225255	-0.598832	0.976401	1
BIOCARTA_G2_PATHWAY	-0.173834	-0.518713	0.998161	1
BIOCARTA_RANMS_PATHWAY	-0.2263	-0.509317	0.965823	1
