# Supplementary material
Source: HighWire-hosted journal article supplement (https://jitc.bmj.com/content/8/2/e001866)
Supplement: inline-supplementary-material-7 [file inline-supplementary-material-7.xlsx]

## Sheet: IP
IP proteins	Razor + unique peptides	Unique + razor sequence coverage [%]	Mol. weight [kDa]	IgG	IP
PGK1	6	19.3	41.428	0	545670
PGAM1	3	12.6	28.82	0	773220
EEF1G	4	10.1	50.118	0	809010
DKFZp547B159	2	13.2	21.203	0	1093300
IPO7	3	3.2	119.52	0	1113500
LDHA	5	15.4	36.688	0	1325700
NSF	3	5.8	77.876	0	1347400
EHD4	4	9.1	61.155	0	1381800
RPL35	2	15.6	10.645	0	1498500
TKT	7	15.6	58.981	0	1527000
PABPC1	5	11.3	61.18	0	1604100
cDNA FLJ95462	3	5.6	79.222	0	1677100
ACAT1	2	7.5	45.199	0	1741600
cDNA PSEC0175	6	16.9	54.102	0	1823700
YWHAZ	3	11.4	27.745	0	2072700
XPO1	5	7.4	123.38	0	2140200
EEF1E1	2	15.1	15.548	0	2158700
CNP	5	17.7	45.098	0	2173300
EXOC4	3	4	110.5	0	2249200
ALDH1A3	4	11.4	44.256	0	2292500
PHB	2	9.5	22.27	0	2317100
TRA1	12	18.5	92.339	0	2402200
ACTA1	3	10.8	38.579	0	2732800
DYNC1H1	5	1.4	532.4	0	3337200
RPS13	3	20.9	16.733	0	3447600
ALDOA	7	22.7	39.34	0	3492400
CCT3	8	21.4	55.674	0	3687900
cDNA FLJ95470	4	6.7	104.12	0	3920300
EXOC3	3	7.4	53.241	0	4378400
CAD	4	3.9	235.18	0	4848500
RPS14	3	16.6	16.273	0	5090200
GCN1L1	5	2.8	292.74	0	6219900
RPS16	4	26.4	14.419	0	6314300
CLTC	5	4.8	187.89	0	6321600
MYH9	12	7.4	226.53	0	7847300
SLC25A5	4	18.8	32.852	0	8112800
VIM	4	9.7	49.653	0	9126600
EL52	10	14.6	84.659	0	9763900
HSPD1	17	36.6	60.68	0	10542000
SOGA1	6	8.9	115.83	0	10957000
ARHGEF10	3	5.3	109.65	0	11607000
PRKDC	7	2.3	465.38	0	19925000
HIST1H1C	4	19.2	21.364	0	31200000
TNFAIP3	11	30.4	54.366	0	45657000
IGHG1	4	8.8	36.105	0	1349800000

## Sheet: high express
Accession	Description	Sum(Coverage)	Sum(# Unique Peptides)	Sum(# PSMs)	A2058 SIA20	A2058 NC	A375 SIA20	A375 NC	# AAs	MW [kDa]	calc. pI
P26641	EEF1G	0.4485	17	106	4200000000	2462000000	5634000000	4193000000	437	50.1	6.67
O95373	IPO7	0.2813	27	104	916200000	707200000	914200000	627400000	1038	119.4	4.82
P29401	TKT	0.5602	32	314	6336000000	3575000000	7392000000	6320000000	623	67.8	7.66
P11940	PABPC1	0.5047	22	124	1902000000	1042000000	2798000000	2441000000	636	70.6	9.5
A0A024R1T5	CNP	0.4663	20	60	903700000	784900000	679300000	596700000	401	45.1	8.53
P35232	PHB	0.6618	16	93	2319000000	1110000000	2961000000	2220000000	272	29.8	5.76
H7BZJ3	PDIA3	0.4878	1	33	2858000000	1828000000	2736000000	2395000000	123	13.5	7.3
H0YAL7	EEF1E1	0.3676	3	12	164000000	147000000	446700000	175400000	136	15.3	8.4
Q96KP1	EXOC2	0.1234	8	11	59840000	2014000	116300000	0	924	104	6.9
Q00610	CLTC	0.517	85	737	3239000000	2428000000	4541000000	3231000000	1675	191.5	5.69
P35579	MYH9	0.6245	134	859	2374000000	1858000000	2953000000	1345000000	1960	226.4	5.6
Q14204	DYNC1H1	0.4994	212	704	939500000	659900000	874000000	475800000	4646	532.1	6.4
Q00610	CLTC	0.517	85	737	3239000000	2428000000	4541000000	3231000000	1675	191.5	5.69

## Sheet: low express
Accession	Description	Sum(Coverage)	Sum(# Unique Peptides)	Sum(# PSMs)	A2058 SIA20	A2058 NC	A375 SIA20	A375 NC	# AAs	MW [kDa]	calc. pI
Q6NX51	EXOC4	0.2115	15	29	196200000	46680000	228300000	87520000	974	110.4	6.49
P10809	HSPD1	0.7818	30	767	13390000000	6344000000	9370000000	9578000000	573	61	5.87
Q5CAQ5	TRA1	0.6633	64	670	11770000000	6247000000	10990000000	8719000000	802	92.3	4.86
