# Supplementary material
Source: HighWire-hosted journal article supplement (https://jitc.bmj.com/content/8/2/e001866)
Supplement: inline-supplementary-material-8 [file inline-supplementary-material-8.xlsx]

## Sheet: CKSAAP_Ubsite
Position	Score	Description
4	0.056726	Low confidence
11	0.019521	No
63	0.07038	No
83	0.086182	No
128	0.020564	No
177	0.02258	No
186	0.19895	High confidence
202	0.179188	High confidence
207	0.131614	High confidence
208	0.128903	Low confidence
219	0.081435	Low confidence
240	0.115023	Low confidence

## Sheet: Ubpred
Residue	Score	Ubiquitinated
4	0.4	No
11	0.49	No
63	0.37	No
83	0.52	No
128	0.35	No
177	0.37	No
186	0.63	Yes
202	0.67	Yes
207	0.51	No
208	0.67	Yes Low confidence
219	0.6	No
240	0.48	No
